1 **Secondary-structure prediction revisited: P $\beta$  and P $c$  represent structures of**  
2 **amyloids and aid elucidating phenomena in interspecies transmissions of prion.**

3  
4  
5 **Yuzuru Taguchi and Noriyuki Nishida**

6  
7 Division of Cellular and Molecular Biology,  
8 Department of Molecular Microbiology and Immunology  
9 Nagasaki University Graduate School of Biomedical Sciences  
10 Basic Medical Science Building (8 floor)  
11 1-12-4 Sakamoto, Nagasaki 852-8523  
12 JAPAN  
13 TEL: +81-95-819-7059 / FAX:+81-95-819-7060

14  
15  
16 **Key words:** Secondary structure prediction, prion, amyloid,  $\beta$ -sheet propensity, strain, species barrier

17  
18 **Abbreviations:** A $\beta$ 42,  $\beta$ -amyloid of 42 residues. BSE, bovine spongiform encephalopathy. CJD,  
19 Creutzfeldt-Jakob disease. CWD, chronic wasting disease. DNI, dominant-negative inhibition. GFP, green  
20 fluorescence protein. GPI, glycosylphosphatidylinositol. OPR, octapeptide-repeat region of prion protein.  
21 P $\alpha$ , theoretical  $\alpha$ -helix propensity. P $\beta$ , theoretical  $\beta$ -sheet propensity. P $c$ , theoretical random-coil propensity.  
22 PrP, prion protein. PrP<sup>C</sup>, normal isoform of PrP. PrP<sup>Sc</sup>, disease-associated conformer of PrP. Tg mouse,  
23 transgenic mouse. TSE, transmissible spongiform encephalopathy.  
24

1     **Abstract**

2     Prion is a unique infectious agent which consists solely of abnormally-folded prion protein (PrP<sup>Sc</sup>) but  
3     possesses virus-like features, e.g. existence of strain diversity, adaptation to new hosts and evolutionary  
4     changes. These biological phenomena were attributed to the structural properties of PrP<sup>Sc</sup> due to lack of  
5     genetic material of prion. Therefore, regardless of incompatibility with high-resolution structural analysis,  
6     many structural models of PrP<sup>Sc</sup> have been hypothesized based on limited structural information and,  
7     recently, models consisting solely of  $\beta$ -sheets and intervening loops/kinks have been suggested, i.e.  
8     parallel in-register  $\beta$ -sheet models and  $\beta$ -solenoid model. Given the relatively simple structural models of  
9     PrP<sup>Sc</sup>, we utilized values of theoretical  $\beta$ -sheet or random-coil propensity ( $P_{\beta}$  or  $P_c$ , respectively) calculated  
10    by secondary structure prediction with a neural network to analyze interspecies transmissions of prion,  
11    because numerical conversion of the primary structures would enable quantitative comparison between  
12    PrP with distinct primary structures. Reviewing experiments in the literature, we ascertained biological  
13    relevance of  $P_{\beta}$  and  $P_c$  and demonstrated how those parameters could aid interpretation and explain  
14    phenomena in interspecies transmissions. Our approach can lead to development of a versatile tool for  
15    investigation of not only prion but also other amyloids.

16

1 Today, many incurable neurodegenerative diseases including Alzheimer's disease, Parkinson's  
2 disease and tauopathy are known to be caused by misfolding and amyloid formation of constitutively-  
3 expressed proteins. Although the amyloidogenic proteins physiologically exist as monomers in normal  
4 conformations, once they are misfolded and form amyloid nuclei/fibers, the nuclei induce misfolding of the  
5 normal conformers and incorporate them into the amyloids to grow in size and number, a process referred  
6 to as seeding. Thus amyloids propagate and eventually cause diseases. Transmissible spongiform  
7 encephalopathies (TSEs) are also a group of diseases caused by misfolding of prion protein (PrP),  
8 including Creutzfeldt-Jakob disease (CJD) in humans, bovine spongiform encephalopathies (BSE) in cattle,  
9 chronic wasting disease (CWD) in elk and scrapie in sheep. Unlike other amyloids, propagation of the  
10 misfolded PrP (PrP<sup>Sc</sup>) is very efficient and behaves like a virus despite lack of nucleotides as an infectious  
11 agent called prion. For instance, a prion has preferred species for the host, e.g. BSE's preference for cattle  
12 or sheep, and transmissions to the other species are often inefficient with longer incubation periods, i.e.  
13 species barrier. However, once the barrier is overcome, the prion changes the host range and the  
14 secondary passage is more efficient with shorter incubations [1]. Moreover, in transmissions of TSE,  
15 clinicopathological traits of the donor, e.g. clinical courses, distribution of lesions and PrP deposition  
16 patterns, are faithfully reproduced in the recipient: mistaken as a virus, each prion with unique  
17 clinicopathological properties was called "strain". The protein-only hypothesis argues that strain-specific  
18 pathogenic information is enciphered in structures of PrP<sup>Sc</sup> and is inherited when host-encoded normal  
19 conformer PrP (PrP<sup>C</sup>) is refolded by PrP<sup>Sc</sup> in template-directed manner [1]. Hence, the structures of PrP<sup>Sc</sup>  
20 are important, but remain undetermined due to its incompatibility with conventional high-resolution structure  
21 analysis. Regardless, structural information of PrP<sup>Sc</sup> have been collected through various methods like  
22 electronmicroscopic analysis of scrapie fibrils [2], hydrogen/deuterium-exchange mass spectrometry [3],  
23 disulfide cross-links of *in vitro*-formed PrP fibrils [4] and *in silico* analysis [5,6] to create structural models of  
24 PrP<sup>Sc</sup>. Although models with remaining  $\alpha$ -helices were previously postulated [2,4,5], recently models devoid  
25 of  $\alpha$ -helix, e.g. the " $\beta$ -solenoid model" [7] and the "parallel in-register intermolecular  $\beta$ -sheet model" [8–10]  
26 have been postulated as the more plausible models. However, so far, none of the models seems to  
27 elucidate the mechanisms underlying the virus-like properties of prions.

28 If PrP<sup>Sc</sup> consists solely of  $\beta$ -sheets and intervening loops/kinks, the PrP<sup>C</sup>-PrP<sup>Sc</sup> interactions would be  
29 also relatively simple, especially in the case of parallel in-register models where each region of the  
30 substrate PrP<sup>C</sup> interacts with the corresponding region of the template PrP<sup>Sc</sup>. Given the simple interaction  
31 modality, we thought that numerical conversion of the primary structure of PrP by algorithms which render  
32 structural information of PrP<sup>Sc</sup> enable quantitative comparison between PrP of different primary structures,  
33 facilitating interpretation of results of interspecies transmission experiments; besides, arithmetic operation  
34 of the converted values might reflect certain aspects of the PrP<sup>C</sup>-PrP<sup>Sc</sup> interactions. Therefore, for this  
35 purpose we attempted to use theoretical propensity to  $\beta$ -sheet formation ( $P_{\beta}$ ) calculated by a neural-  
36 network secondary structure prediction (<http://cib.cf.ocha.ac.jp/bitool/MIX/>) [11], based on the following four  
37 assumptions: (i) PrP<sup>Sc</sup> consists of only  $\beta$ -sheets and intervening loops/kinks; (ii) regional structures of PrP<sup>Sc</sup>  
38 including positions of the  $\beta$ -strands are determined by 'actual' intrinsic propensity to  $\beta$ -sheet formation; (iii)

1 since there is supposedly no  $\alpha$ -helix in PrP<sup>Sc</sup>, theoretical propensity to  $\alpha$ -helix ( $P\alpha$ ) is ignored; and (iv) the  
2  $P\beta$  value at each residue substitute for the actual  $\beta$ -sheet propensity and, whether large or small,  
3 represents the regional structures of PrP<sup>Sc</sup>. Those assumptions allow using  $P\beta$ -graph as a surrogate model  
4 of the structure of PrP<sup>Sc</sup>.

5 Here, we confirmed biological relevance of  $P\beta$  by application to *in vitro* experiments from the  
6 literature, and incidentally discovered that the propensity to random coil structure ( $Pc$ ) values are also  
7 important, being apparently related to cross-seeding efficiencies of amyloidogenic peptides. Then, we  
8 reviewed the results of interspecies transmission experiments in the literature from the view point of the  
9 above assumptions.  $P\beta$  analysis visually aided interpretation of experimental transmissions involving  
10 heterologous PrP molecules and gave possible explanations to the varied incubations among different  
11 hamster species and the changes of host ranges after interspecies transmissions.

## 12 13 **Results and Discussion**

### 14 ***P $\beta$ -graphs of representative species***

15 In the beginning, we compared  $P\beta$ -graphs of PrP from representative species. They were mostly the  
16 same as expected from the high homology in the primary structures, except for variations in the heights of  
17 some peaks (**Fig. 1B**). For example, Syrian hamster had a relatively low peak centered at 110 (**Fig. 1B,**  
18 **blue arrow**), while human or elk PrP had outstandingly high peaks centered at the residue 140 or 175,  
19 respectively (**Fig. 1B, red or green arrow**). Significance of the differences in the heights of those  $P\beta$  peaks  
20 is shown in the following sections. Incidentally, we noticed that there are apparently more  $P\beta$  peaks in PrP  
21 than in A $\beta$ 42 or  $\alpha$ -synuclein (**Fig. 1C and D**). According to the initial assumptions, the  $P\beta$ -peaks could be in  
22  $\beta$ -sheets in the template PrP<sup>Sc</sup> and the similar structures are induced in the substrate PrP<sup>C</sup> through direct  
23 contacts, with the high- $P\beta$  regions functioning as the interaction “interfaces” with the PrP<sup>Sc</sup>: In the case, the  
24 existence of many peaks might be responsible for the strain diversity of prions, as we previously  
25 hypothesized [12]. Whether the  $P\beta$ -peaks actually correspond to the regions which have high affinity for  
26 PrP<sup>Sc</sup>, i.e. candidates for the interfaces, was critical for the purpose and we attempted confirmation of  
27 biological relevance of  $P\beta$  values.

### 28 ***Testing biological relevance: Application to $\Delta$ PrP-series and C-terminally-truncated mutant PrP***

29 To test the biological relevance of the  $P\beta$ -graphs, we applied the algorithm to  $\Delta$ PrP-series (**Fig. 2A,**  
30 **left panel**), which is a series of mutant PrP with various lengths of internal deletions in the region from the  
31 residue 159 to 175 [13]. Inverse correlation between the deletion sizes and efficiencies of dominant-  
32 negative inhibition (DNI) of the deletion mutants (**Fig. 2A, right panel**) implied that the region is the main  
33 interface for  $\Delta$ PrP to bind the template PrP<sup>Sc</sup>. On the  $P\beta$ -graph of wild-type mouse PrP, two peaks, i.e.  
34 interface candidates, were recognized in the region 159-175 (**Fig. 2B**). As the deletion was elongated from  
35 the residue 159 to the C-terminal direction, the peak of  $P\beta$  centered at  $\sim$ 160 was gradually lowered (**Fig.**  
36 **2B or 2C, red arrow**) and almost disappeared in  $\Delta$ 159-166. The other peak centered at  $\sim$ 175 (**Fig. 2D,**  
37 **black arrow**) also became narrower in  $\Delta$ 159-171 (**Fig. 2D, red arrow**) and finally disappeared in  $\Delta$ 159-175  
38 (**blue line with open square**). Collectively, the gradual disappearances of the two peaks of  $P\beta$ -graphs of



1  $\Delta$ PrP series seemed to correlate with the gradual decrease of DNI of the mutants [13]. The correlation of  
2 the alterations of P $\beta$ -graph with the biological events substantiated a certain degree of its biological  
3 relevance.

4 We also applied the algorithm to the C-terminally-truncated mutant human PrP, PrP23-144. Jones  
5 and colleagues reported that a deletion of the region from the residue 113 to 120, which supposedly  
6 constitute a  $\beta$ -sheet core of the amyloid, did not affect amyloidogenicity of the deletion variant, to their  
7 surprise, and solid-state NMR of the variant revealed an altered  $\beta$ -core encompassing 106 to 125 [14]. On  
8 P $\beta$ -graphs of PrP23-144 and the deletion variant (**Fig. 2E**), a large peak was newly generated by the  
9 internal deletion  $\Delta$ 113-120 albeit with discrepancy in its exact position from the result of solid-state NMR,  
10 suggesting a possibility that P $\beta$  analysis could have predicted the newly-formed  $\beta$ -sheet core.

### 11 **Testing biological relevance: Significance of P $\beta$ and P $c$ values on cross-seeding efficiencies**

12 Regarding this type of truncated mutants, we were also interested in experiments of cross-seeding  
13 reaction among the PrP23-144 from human, mouse and Syrian hamster PrP [Hu(23-144), Mo(23-143) and  
14 Sy(23-144), respectively] [15]. The Hu(23-144) could be cross-seeded by *in vitro*-formed fibrils of Mo(23-  
15 143) but not by fibril of Sy(23-144), while Mo(P23-143) was cross-seeded by either fibril of Hu or Sy(23-  
16 144). In contrast, neither human nor mouse fibrils could seed Sy(23-144). P $\beta$ -graphs of those molecules  
17 were clearly different in the C-terminal region, with the human outstandingly high, the hamster the lowest  
18 and the mouse at the intermediate (**Fig. 3A**): those differences seemed to well-correlate with their fibril-  
19 formation efficiencies [15]. We checked theoretical propensity to random-coil structure (P $c$ ) by the same  
20 algorithm and found that there were unequivocal differences between the three in the region from 132-136,  
21 which has a peak in P $c$ -graph (**Fig. 3B**) and a trough in the P $\beta$ -graph (**Fig. 3A**). Suspecting potential  
22 significance of the P $c$  values for cross-seeding efficiencies, we also reviewed a series of cross-seeding  
23 experiments of an amyloidogenic peptide derived from tau protein (R3) and its variants, e.g. C-terminally-  
24 truncated variants and substitution variants with the serine at the residue 316 replaced with either proline  
25 (R3-S316P) or alanine (R3-S316A) [16]. In the experiments, fibril formation of R3-316P was very slow on  
26 its own but could be enhanced by adding fibrils of wild-type R3 or other variants as a seed. However, R3-  
27 S316A and C-terminally-truncated variants which lack the serine at 316 did not exert the seeding effects.  
28 On P $\beta$ -graphs of the peptides, R3-S316A and R3-S316P had peaks at different positions (**Fig. 3C, blue**  
29 **and red arrows**). On the P $c$ -graphs, interestingly R3-S316P and the C-terminally-truncated variants which  
30 could seed R3-S316P, namely  $\Delta$ CR3SK and  $\Delta$ CR3S, showed similar curves whereas another truncated  
31 variant  $\Delta$ CR3 which could not seed showed a pattern closer to wild-type R3 (**Fig. 3D**). The possible relation  
32 between the seeding effects and P $c$  is discussed in detail below.

### 33 **Testing biological relevance: Effects of a prion-resistant polymorphism**

34 We analyzed a conversion-resistant polymorphisms of human PrP, valine at the residue 127 (V127)  
35 [17], in comparison with another polymorphism, valine at 129 (V129). V127 showed a shift of the P $\beta$  peak  
36 at 129 (**Fig. 4A, red arrow**) with elevation of the region 125-128 (**black upward arrows**) and sink of the  
37 peak at 122 (**black down-ward arrow**), while V129 simply elevated the peak at 129 despite they are only  
38 single-residue apart (**Fig. 4A, blue arrow**). Comparison of P $c$ -graphs of V129 and V127 (**Fig. 4B**) revealed

1 that the Pc-peak of V127 in the P $\beta$ -trough region (**gray curve**) were rather lower and narrower than that of  
2 the wild-type or V129. Possibly, the remodeling of P $\beta$  and Pc by V127 is responsible for the resistance to  
3 the conversion to PrP<sup>Sc</sup>, because a PrP with a shifted  $\beta$ -strand would have difficulty in arrangement with the  
4 counterpart of the template PrP<sup>Sc</sup> side-by-side to form stable parallel-in-register  $\beta$ -sheets. The same holds  
5 true to the tau-derived peptides R3-S316A and R3-S316P, which had P $\beta$  peaks at different positions and  
6 did not cross-seed (**Fig. 3A**). Besides, properties of the loop/kink regions connecting the  $\beta$ -strands might  
7 affect the parallel in-register  $\beta$ -sheet formation as well (**Fig. 4C**). Hennetin and colleagues suggested  
8 significance of  $\beta$  strand-loop- $\beta$  strand motif ( $\beta$ -arch), especially of the loop region ( $\beta$ -arc), for parallel in-  
9 register  $\beta$ -sheet formation [18]. They created an algorithm “ArchCandy” for prediction of amyloidogenicity  
10 based on their hypothesis, which correctly predicted amyloidogenicity of some representative amyloids and  
11 even structures of the  $\beta$ -arches [19]. Although ArchCandy failed to explain the results of the aforementioned  
12 experiments of PrP23-144, their ideas seem rather reasonable and promising. If the Pc values are another  
13 representation of the structures of the  $\beta$ -arcs, the varied cross-seeding efficiencies of PrP23-144 or tau R3-  
14 derived peptides are explainable in the light of the  $\beta$ -arc theory, i.e. peptides with similar Pc values in the  
15 P $\beta$ -trough can cross-seed because they have similar  $\beta$ -arcs. As another explanation for the varied cross-  
16 seeding efficiencies, it is also intuitively conceivable that a flexible loop/kink of the substrate peptide would  
17 be more adaptive and facilitate arrangement of the  $\beta$ -strands in appropriate positions and orientations for  
18 incorporation into the template, particularly in heterologous reactions (**Fig. 4D, middle left panel**), whereas  
19 a rigid loop/kink has difficulty. From this view point, the above cross-seeding efficiencies of PrP(23-144) of  
20 human, mouse and Syrian hamster could be explained like this: as the lowest Pc of Sy(23-144) reflects a  
21 rigid loop/kink, Sy(23-144) is least adaptive and cannot be cross-seeded, whereas Mo(23-144) or Hu(23-  
22 144) has a more flexible adaptive loop/kink and is prone to cross-seeding in heterologous reactions. On the  
23 other hand, a less flexible loop/kink might be advantageous in parallel in-register  $\beta$ -sheet formation in  
24 homologous reactions because the restricted freedom of motions would enhance arrangements of  $\beta$ -  
25 strands (**Fig. 4D, bottom left panel**). Seeking more quantitative evidence for the biological relevance of P $\beta$   
26 and Pc, we utilized the data of fluorescence intensities of GFP fused to A $\beta$ 42 mutants [20] (**Supplementary**  
27 **Results and Discussion** and **Supplementary Fig. S1**). Briefly, the P $\beta$  alone showed a fair correlation with  
28 the fluorescence intensity (correlation coefficient -0.768) (**Supplementary Fig. S1B**), an indicator of  
29 aggregation tendency, but the ratio of P $\beta$  and Pc exhibited even better correlation (correlation coefficient -  
30 0.833), supporting our view (**Supplementary Fig. S1C**). It should be noted that the view does not  
31 necessarily specify the parallel in-register  $\beta$ -sheet model as the correct one, because  $\beta$ -arches are also  
32 important structural components of  $\beta$ -solenoids [18]. Although it is much easier to picture the conversion  
33 reaction of parallel in-register amyloids, other evidences are required to specify which is correct.

#### ***Versatility of P $\beta$ in interpretation of transmission results: Introduction of relative $\Delta P\beta$***

35 As P $\beta$  seemed to have biological relevance, we assessed versatility of numerical conversion of the  
36 primary structure of PrP in analysis of interspecies transmission experiments. However, variation in the  
37 heights of the peaks made P $\beta$ -graphs inconvenient for comparison between PrP from different species; for  
38 example, it obscures significance of differences in P $\beta$  in regions with relatively-low P $\beta$  values. Considering

1 that PrP<sup>Sc</sup> already has  $\beta$ -sheets even in such regions irrespective of theoretical P $\beta$  and that refolding of the  
2 substrate PrP<sup>C</sup> is assisted by the  $\beta$ -sheet-rich PrP<sup>Sc</sup> in template-guided manner, we reasoned that a  
3 parameter relative to the absolute P $\beta$  values of the template PrP would more appropriately represent  
4 impacts of the differences in the primary structures. Therefore, we adopted a parameter, relative  $\Delta$ P $\beta$ ,  
5 which represents deviations in P $\beta$  between the substrate PrP<sup>C</sup> and the template PrP<sup>Sc</sup>, cf. Material and  
6 Methods. We applied the new parameter to PrP of three intensively-investigated species, mouse, bank vole  
7 and Syrian hamster and found it useful for comparison between different species (**Fig. 5A**). Note that the  
8 mouse and bank vole PrP were especially different in the region 150-175, which comprises the two  
9 residues reported to be responsible for the unique transmission properties of bank vole, namely 154 and  
10 169 [21]. As expected from the formula, the  $\Delta$ P $\beta$ -graph patterns were greatly changed depending on the  
11 reference species, e.g. human (**Fig. 5B**) or elk (**Fig. 5C**).

### 12 ***Interspecies transmissions between various hamsters***

13 Transmission efficiency of a prion in interspecies transmissions is hypothesized to depend on  
14 whether the conformation of the inoculated PrP<sup>Sc</sup> is included within the repertoire of conformations that PrP  
15 of the recipient species can potentially adopt [22]. As an indicator of deviations in P $\beta$  between two PrP, we  
16 thought relative  $\Delta$ P $\beta$ -graph could reflect differences in the repertoire of conformations between substrate  
17 and template PrP. We analyzed experimental transmissions of Syrian hamster prion Sc237 to Chinese  
18 hamster and Armenian hamster [23] and another series of transmission of Syrian hamster prion 263K,  
19 which is purported to be the same as Sc237, to a similar set of hamster species [24]. Inoculations of Sc237  
20 to Armenian hamster or Chinese hamster developed diseases after incubation periods of ~174 days or  
21 ~344 days, respectively [23]. As the primary structures of PrP of the two hamster species are distinct at  
22 three residues, specifically 102, 107 and 111, the difference in the incubation periods seemed to be due to  
23 the residues. On  $\Delta$ P $\beta$ -graphs relative to Syrian hamster (**Fig. 6A**), the differences in the primary structures  
24 were recognized as distinct sizes of positive peaks in the region 95-120 and the sizes seemed to correlate  
25 with their incubation lengths: the higher and wider the positive  $\Delta$ P $\beta$  peak centered at 110, the longer the  
26 incubation. This implied that Sc237 disfavors high P $\beta$  values in the region, exemplifying that high P $\beta$  is not  
27 necessarily advantageous for efficient transmission. The long incubations of ~314 days in the transmission  
28 of Armenian hamster-passaged Sc237 to Chinese hamster, whose relative  $\Delta$ P $\beta$  showed a large positive  
29 peak in the region 110-120 (**Fig. 6B, red curve**), also supported the view. In the back-transmissions of  
30 Chinese hamster- or Armenian hamster-passaged Sc237 to Syrian hamster, interestingly, incubation  
31 periods were relatively short and not very different, ~121 days or ~113 days, respectively. Although these  
32 phenomena were regarded as the evidence for host factors determining the incubation length [23,24],  
33 these seemed explainable also by the influences of properties of loops/kinks on PrP<sup>C</sup>-PrP<sup>Sc</sup> conversion.  
34 The relative  $\Delta$ P $\beta$ -graphs of the back transmissions were almost mirror images of the  $\Delta$ P $\beta$ -graphs of the  
35 forward transmissions, with the positive peaks in the latter inverted to negative peaks in the former and *vice*  
36 *versa* (**Fig. 6B**). In the transmission from Chinese hamster to Syrian hamster, a substantial part of the  
37 negative peak at the region 105-120 matches the P $\beta$ -trough (**Fig. 6B, arrow**). If a P $\beta$ -trough represents a  
38 loop/kink as discussed above, lower P $\beta$  in the trough could represent a more flexible loop/kink and more

1 adaptive to a heterologous template (**Fig. 4D**); that might be the reason for the relatively small difference in  
2 incubation periods. Notably, Djungarian hamsters showed relatively short incubation periods for Syrian  
3 hamster 263K, despite the same  $\Delta P\beta$ -graph pattern as Chinese hamster in the region 95-120 (**Fig. 6A,**  
4 **green curve**), as if the negative effects of the positive peak at 110 was neutralized by another positive  
5 peak at  $\sim 140$ . As one possibility, this is attributable to stronger interactions of Djungarian-hamster PrP with  
6 the template PrP<sup>Sc</sup> through the interface at  $\sim 140$  because of the higher P $\beta$ . The strong interactions could  
7 keep substrate and template PrP molecules close long enough for the other interface region at  $\sim 110$  to  
8 complete structural changes. Another possibility is discussed below.

### 9 ***Change of the host range of C-BSE through interspecies transmission***

10 TSEs often drastically change transmission properties after interspecies transmissions. For example,  
11 sheep-passaged C-BSE is more efficiently transmissible to transgenic (Tg) mice expressing human PrP  
12 [25], elk PrP [26] or porcine PrP [27]. Mouse-passaged C-BSE becomes transmissible to Syrian hamsters  
13 [28]. Ferret-adapted CWD more efficiently infect Syrian hamsters [29]. Not only enhancement of virulence,  
14 loss of transmissibility to the original species can also occur, as seen in the poor transmission of the CWD  
15 passaged in bank vole-PrP-expressing Tg mice to elk PrP-expressing Tg mice [30]. We expected that  
16 relative  $\Delta P\beta$  analysis could visually aid interpretation of the results of those interspecies transmissions and  
17 provide a clue to the underlying mechanisms. The relative  $\Delta P\beta$ -graph of the transmission of sheep-  
18 passaged C-BSE to elk-PrP-expressing Tg mice (**Fig. 7A, green curve**) apparently showed less deviation  
19 from the base line than the  $\Delta P\beta$ -graph of the transmission of cattle C-BSE to elk (**Fig. 7A, red curve**),  
20 suggesting a possibility that the enhanced transmissibility might be due to improvement of the deviations in  
21 P $\beta$  between the template PrP<sup>Sc</sup> and the substrate PrP<sup>C</sup>. Relative  $\Delta P\beta$ -graphs of cattle-ovine-porcine serial  
22 transmission of C-BSE also showed the improvement of deviations in the regions 150-165 and 180-195  
23 (**Fig. 7B, bottom brackets**). Possibly, the improvement of deviations between the template PrP<sup>Sc</sup> and the  
24 substrate PrP<sup>C</sup> in those regions might compensate for the remaining deviation in the intervening region.  
25 Although less apparent than those two cases, cattle-mouse-Syrian hamster serial transmission of C-BSE  
26 would be also explained in the same manner: The  $\Delta P\beta$ -graph is flattened in the region 175-195 and the  
27 deviation in the region 145-150 is also improved approaching to the baseline (**Fig. 7C, bottom brackets**).  
28 Unlike the foregoing cases, in the transmission of sheep-adapted BSE to Tg mice expressing human PrP,  
29 the relative  $\Delta P\beta$ -graph did not become flat in the region 180-195 but the deviation in the sheep-to-human  
30 transmission seemed improved compared with that of the cattle-to-human transmission (**Fig. 7D**).

31 Collectively, those results imply that the improvements in the deviations in the regions 150-165 and 180-  
32 195 might facilitate transmissions of C-BSE to originally less-susceptible species. This implication requires  
33 validation by other types of experiments. If proven true, it strongly supports the legitimacy of our approach.

### 34 ***Change of the host range of CWD through interspecies transmission***

35 In the relative  $\Delta P\beta$ -graph of transmission of ferret-passaged CWD to Syrian hamster (**Fig. 7E, green**  
36 **curve**), one positive peak newly appeared in the region 170-180, which has the crest at the similar position  
37 as the P $\beta$  peak at  $\sim 175$  of elk PrP (**Fig. 7E, arrow**), compared with transmission of elk CWD to Syrian  
38 hamster (**red curve**). This seemed reminiscent of a  $\Delta P\beta$ -graph of transmission of CWD to Tg mice

1 expressing chimeric human PrP with elk residues in the region 166-174, which greatly facilitated  
2 transmission of CWD, compared with Tg mice expressing pure human PrP [31]. On relative  $\Delta P\beta$ -graph, the  
3 negative peak in the region 160-180 seen in the  $\Delta P\beta$ -graph of elk-to-human transmission was completely  
4 buried in the chimeric PrP (**Fig. 7F, arrow**). Those findings suggest that smaller discrepancies in  $P\beta$  in the  
5 region between substrate and template are advantageous for propagation of CWD prion.

#### 6 ***Mechanism of strain diversity from our view point***

7 Relative  $\Delta P\beta$  is unambiguously defined by the primary structures of PrP of donor and recipient  
8 species. On the other hand, even between the same pair of species, some prion strains are transmissible,  
9 whereas others are not. For example, cattle C-BSE is transmissible to mouse but L-BSE is not. This could  
10 be explained by strain-specific patterns of usages and/or predominance of certain interfaces among the  
11 multiple interfaces of PrP [12]: some strains favor high  $P\beta$  values in a certain interface region, while other  
12 strains demand low  $P\beta$  in the same region. Such variations could presumably stem from either stochastic  
13 events, presence of cofactors and/or environments during the initial nucleation of PrP<sup>Sc</sup>, and be inherited to  
14 the offsprings.

#### 15 ***Problems to be addressed in the future: intrinsic properties***

16 Beside  $P\beta$  values, other attributes of  $\beta$ -strands of the interface regions also theoretically affect  
17 interaction efficiencies between the substrate PrP<sup>C</sup> and template PrP<sup>Sc</sup>, including interactions through side  
18 chains (e.g. steric zipper or electrostatic interactions), twist/tortion of  $\beta$ -strands, and positioning and  
19 orientations relative to the other strands [32]. To address those factors, molecular dynamic simulation of  
20 parallel-in-register amyloids would be necessary for future studies. Apart from that, an algorithm which  
21 combines the characteristics of ArchCandy and the secondary-structure prediction seems feasible because  
22 both of them depend solely on the primary structure for calculation. Such an algorithm might further  
23 improve the prediction of regional structures of PrP<sup>Sc</sup>, while providing an insight into another aspect of  
24 intrinsic propensities of PrP.

#### 25 ***Problems to be addressed in the future: extrinsic factors***

26 We demonstrated that  $P\beta$  and  $P_c$  carry a substantial information about regional structures of amyloids.  
27 On the other hand, we are aware that there are many other factors which definitely affect conversion  
28 efficiency of the substrate PrP<sup>C</sup> but are incalculable by the algorithm, e.g. post-translational modifications  
29 like GPI anchor, N-linked glycans and the disulfide bond between the second and the third helices.  
30 Particularly, the disulfide bond can cause unpredictable results by keeping high- $P\beta$  regions in vicinity and  
31 precipitating their interactions. Even without a disulfide bond, if PrP<sup>Sc</sup> is compactly folded as the parallel in-  
32 register  $\beta$ -sheet model illustrates [8], interactions between high- $P\beta$  regions can occur in theory: Possibly  
33 the aforementioned relatively-short incubations in transmissions of 263K to Djungarian hamster could be a  
34 manifestation of such effects. Certain types of phospholipids or nucleotides which are postulated to be  
35 “cofactors” for PrP<sup>C</sup>-PrP<sup>Sc</sup> conversion might also affect actual  $\beta$ -sheet propensities [33–35]. Those extrinsic  
36 factors should greatly contribute to the behaviors and the strain diversity of prions and always have to be  
37 considered in investigations with  $P\beta$  and  $P_c$ .



1 By addressing those problems, our approach can lead to development of new investigation tools which  
2 are applicable to not only prion but also other amyloids, e.g. A $\beta$  or  $\alpha$ -synuclein. Advances of understanding  
3 of protein-protein interactions underlying amyloid propagation and cross-seeding can consequently benefit  
4 even protein science/engineering as well as investigation of neurodegenerative diseases.

## 6 **Materials & Methods**

### 7 **Primary structures of PrP from various species**

8 Amino acid sequences of PrP of various species were obtained from the website of UniProt  
9 (<http://www.uniprot.org/>).

10 The species studied here were mouse (*Mus musculus*), Syrian hamster (*Mesocricetus auratus*), bank vole  
11 (*Myodes glareolus*), human (*Homo sapiens*), elk (*Cervus elaphus nelsoni*), cattle (*Bos taurus*), sheep (*Ovis*  
12 *aries*), pig (*Sus scrofa*), Chinese hamster (*Cricetulus griseus*), Armenian hamster (*Cricetulus migratorius*),  
13 Djungarian hamster (*Phodopus sungorus*) and ferret (*Mustela putorius furo*). A region from the tryptophan  
14 of the second-last repeat of the octapeptide repeat region (OPR), e.g. the 80th residue of mouse PrP, to the  
15 putative GPI-attachment site (e.g. the 231st residue of mouse PrP) was excised and rendered to the  
16 secondary structure prediction by neural network. All the residue numbers are in mouse numbering unless  
17 otherwise noted.

### 18 **Secondary structure prediction**

19 Neural network prediction method [11] available at the website of the Center for Information Biology,  
20 Ochanomizu University (<http://cib.cf.ocha.ac.jp/bitool/MIX/>) was used for secondary-structure prediction of  
21 the selected region of PrP described above. Then, values of the “Neural Network Prediction 2” of the  
22 prediction results were adopted for P $\beta$  values of PrP and processed for creation of P $\beta$ -graph and  
23 calculations of relative  $\Delta$ P $\beta$  values.

### 24 **Definition of Relative $\Delta$ P $\beta$**

25 For acquisition of relative  $\Delta$ P $\beta$ , the selected regions of PrP from different species were arranged so that  
26 the proline at the residue 101 of mouse PrP and the corresponding proline residues of the PrP from other  
27 species are in the same row of the work sheet, as presented in **Supplementary table 1**. By doing this,  
28 most of the corresponding residues of PrP from different species are arranged in the same row.

29 Relative  $\Delta$ P $\beta$  between PrPs from species A and species B at a given residue is defined by the following  
30 formula:

$$31 \text{Relative } \Delta P\beta_{A-B} = \frac{P\beta_A - P\beta_B}{P\beta_B} \times 100$$

32 where P $\beta_A$  and P $\beta_B$  are P $\beta$  value at the corresponding residues of PrP of the species A and B,  
33 respectively, and in this case species B is referred to as the “reference species”.

### 34 **Correlation analysis of P $\beta^{\max}$ or P $\beta^{\max}$ /Pc $^{\max}$ with fluorescence intensities of mutant A $\beta$ 42**

35 P $\beta^{\max}$  is the maximum value of P $\beta$  of a given A $\beta$ 42 mutant in the interval from the residue 16 to 23  
36 (**Supplementary Fig. S1A**). Likewise, Pc $^{\max}$  is the maximum value of Pc in the interval from the residue 13  
37 to 19. For the fluorescence intensities, we measured the lengths of the bars of the graph of the relative

1 fluorescence intensities (presumably representing the mean values) in the paper by De Groot et al. [20]  
2 and compared with the  $P\beta^{\max}$  or the ratio between  $P\beta^{\max}$  and  $Pc^{\max}$ ,  $P\beta^{\max}/Pc^{\max}$ . The scatter plots and the  
3 correlation coefficients were generated using the functions in the Excel2013.

#### 4 **Acknowledgment**

5 We especially appreciate Professor Kei Yura, Ocha-no Mizu University, generously allowing us to use the  
6 secondary structure prediction software on his website along with very helpful advices. We thank Professor  
7 Kajava for kindly providing us with ArchCandy. We also thank Professor Kuwata and Professor Kitao for  
8 critical reading of the manuscript.  
9

10 This study was supported by Takeda Science Foundation.  
11

## 1 **Supplementary Results and Discussion**

### 2 ***Relations between $P\beta$ and $P_c$ values and aggregation propensity using the data from $A\beta$ 42-GFP*** 3 ***fusion protein experiments.***

4 To further test the relation between the  $P\beta$  values calculated by the secondary structure prediction  
5 algorithm and actual aggregation efficiencies of amyloidogenic proteins, we utilized the data of  
6 fluorescence intensities of mutant  $A\beta$ 42-GFP reported by De Groot et al. [20]. In the experiments, they  
7 replaced the phenylalanine at the residue 19 of  $A\beta$ 42 moiety of the fusion protein with nineteen kinds of  
8 amino acids and monitored the mutant's aggregation tendencies by the fluorescence from the GFP moiety;  
9 since the alterations in  $P\beta$  or  $P_c$  mostly occur in a single  $P\beta$ -peak or a  $P\beta$ -trough, this data set was easy to  
10 apply to our system. Comparison between the maximum  $P\beta$  values of the  $P\beta$  peak (**Fig. S1A**) and the  
11 fluorescence intensities revealed a fair degree of correlation with a correlation coefficient -0.768 (**Fig. S1B**).  
12 On the other hand, we noticed that  $P_c$  in the adjacent  $P\beta$ -trough region seemingly changed in association  
13 with the fluorescence intensity, although  $P_c$  itself did not show substantial correlation with the fluorescence  
14 intensities. Since we had suspected a role of  $P_c$  in amyloid formation, we compared the fluorescence  
15 intensities with  $P\beta^{\max}/P_c^{\max}$  ratios. As a result, the correlation coefficient got even better, -0.833, than that of  
16  $P\beta$  alone, whereas highly-charged residues and polarized residues with relatively large side chains, e.g.  
17 glutamine and threonine, still remained as outliers (**Fig. S1C**). This improvement imply a certain level of  
18 influence of  $P_c$  of the  $P\beta$ -trough region on the amyloid formation. Although direct comparison is difficult, the  
19 correlation coefficient on the data set seems comparable with the other amyloid-prediction algorithms [36],  
20 suggesting that  $P\beta$  and  $P_c$  carry substantial structural information of amyloids.

21 The finding that many of the outliers are charged residues would mean that they destabilized the  
22 amyloid formation of  $A\beta$ 42 more than they were supposed to by the secondary structure prediction  
23 algorithm. This is quite understandable because repulsion between the same electric charges in short  
24 distances occur in parallel in-register  $\beta$ -sheet amyloids like  $A\beta$ 42, where the same amino acids are  
25 positioned side-by-side.  
26



## 1 References

1. Prusiner SB (1998) Prions. *Proc Natl Acad Sci U S A* 95: 13363–13383.
2. Wille H, Michelitsch MD, Guenebaut V, Supattapone S, Serban A, et al. (2002) Structural studies of the scrapie prion protein by electron crystallography. *Proc Natl Acad Sci U S A* 99: 3563–3568.
3. Lu X, Wintrode PL, Surewicz WK (2007) Beta-sheet core of human prion protein amyloid fibrils as determined by hydrogen/deuterium exchange. *Proc Natl Acad Sci U S A* 104: 1510–1515.
4. Hafner-Bratkovic I, Bester R, Pristovsek P, Gaedtke L, Veranic P, et al. (2011) Globular domain of the prion protein needs to be unlocked by domain swapping to support prion protein conversion. *J Biol Chem* 286: 12149–12156.
5. DeMarco ML, Daggett V (2004) From conversion to aggregation: protofibril formation of the prion protein. *Proc Natl Acad Sci U S A* 101: 2293–2298.
6. Groveman BR, Dolan MA, Taubner LM, Kraus A, Wickner RB, et al. (2014) Parallel in-register intermolecular  $\beta$ -sheet architectures for prion-seeded prion protein (PrP) amyloids. *J Biol Chem* 289: 24129–24142.
7. Requena JR, Wille H (2014) The structure of the infectious prion protein Experimental data and molecular models. *Prion* 8: 60–66.
8. Groveman BR, Dolan M a, Taubner LM, Kraus A, Wickner RB, et al. (2014) Parallel in-register intermolecular  $\beta$ -sheet architectures for prion-seeded prion protein (PrP) amyloids. *J Biol Chem* 289: 24129–24142.
9. Tycko R, Savtchenko R, Ostapchenko VG, Makarava N, Baskakov I V (2010) The  $\alpha$ -helical C-terminal domain of full-length recombinant PrP converts to an in-register parallel  $\beta$ -sheet structure in PrP fibrils: evidence from solid state nuclear magnetic resonance. *Biochemistry* 49: 9488–9497.
10. Cobb NJ, Sönnichsen FD, McHaourab H, Surewicz WK (2007) Molecular architecture of human prion protein amyloid: a parallel, in-register beta-structure. *Proc Natl Acad Sci U S A* 104: 18946–18951.
11. Qian N, Sejnowski TJ (1988) Predicting the secondary structure of globular proteins using neural network models. *J Mol Biol* 202: 865–884.
12. Taguchi Y, Schätzl HM (2013) Identifying critical sites of PrP<sup>C</sup>-PrP<sup>Sc</sup> interaction in prion-infected cells by dominant-negative inhibition. *Prion* 7: 1–5.
13. Taguchi Y, Mistica AM a, Kitamoto T, Schätzl HM (2013) Critical significance of the region between Helix 1 and 2 for efficient dominant-negative inhibition by conversion-incompetent prion protein. *PLoS Pathog* 9: e1003466.
14. Jones EM, Wu B, Surewicz K, Nadaud PS, Helmus JJ, et al. (2011) Structural polymorphism in amyloids: New insights from studies with Y145Stop prion protein fibrils. *J Biol Chem* 286: 42777–42784.
15. Vanik DL, Surewicz KA, Surewicz WK (2004) Molecular basis of barriers for interspecies transmissibility of mammalian prions. *Mol Cell* 14: 139–145.
16. Jiji AC, Shine A, Vijayan V (2016) Direct Observation of Aggregation-Induced Backbone Conformational Changes in Tau Peptides. *Angew Chemie Int Ed*: 1–6.
17. Asante EA, Smidak M, Grimshaw A, Houghton R, Tomlinson A, et al. (2015) A naturally occurring variant of the human prion protein completely prevents prion disease. *Nature* 522: 478–481.

18. Hennetin J, Jullian B, Steven AC, Kajava A V. (2006) Standard Conformations of  $\beta$ -Arches in  $\beta$ -Solenoid Proteins. *J Mol Biol* 358: 1094–1105.
19. Ahmed AB, Kajava A V. (2013) Breaking the amyloidogenicity code: Methods to predict amyloids from amino acid sequence. *FEBS Lett* 587: 1089–1095.
20. De Groot NS, Aviles FX, Vendrell J, Ventura S (2006) Mutagenesis of the central hydrophobic cluster in A $\beta$ 42 Alzheimer's peptide: Side-chain properties correlate with aggregation propensities. *FEBS J* 273: 658–668.
21. Pirisinu L, Marcon S, Di Bari MA, D'Agostino C, Agrimi U, et al. (2013) Biochemical Characterization of Prion Strains in Bank Voles. *Pathog (Basel, Switzerland)* 2: 446–456.
22. Collinge J, Clarke AR (2007) A general model of prion strains and their pathogenicity. *Science* 318: 930–936.
23. Lowenstein DH, Butler D a, Westaway D, McKinley MP, DeArmond SJ, et al. (1990) Three hamster species with different scrapie incubation times and neuropathological features encode distinct prion proteins. *Mol Cell Biol* 10: 1153–1163.
24. Meade-White KD, Barbican KD, Race B, Favara C, Gardner D, et al. (2009) Characteristics of 263K scrapie agent in multiple hamster species. *Emerg Infect Dis* 15: 207–215.
25. Padilla D, Béringue V, Espinosa JC, Andreoletti O, Jaumain E, et al. (2011) Sheep and goat BSE propagate more efficiently than cattle BSE in human PrP transgenic mice. *PLoS Pathog* 7.
26. Tamgüney G, Miller MW, Giles K, Lemus A, Glidden D V., et al. (2009) Transmission of scrapie and sheep-passaged bovine spongiform encephalopathy prions to transgenic mice expressing elk prion protein. *J Gen Virol* 90: 1035–1047.
27. Espinosa JC, Herva M-E, Olivier Andréoletti O, Padilla D, Lacroux C, et al. (2009) Transgenic mice expressing porcine prion protein resistant to classical scrapie but susceptible to sheep bovine spongiform encephalopathy and atypical scrapie. *Emerg Infect Dis* 15: 1214–1221.
28. Shu Y, Masujin K, Okada H, Iwamaru Y, Imamura M, et al. (2011) Characterization of Syrian hamster adapted prions derived from L-type and C-type bovine spongiform encephalopathies. *Prion* 5: 103–109.
29. Bartz JC, Marsh RF, McKenzie DI, Aiken JM (1998) The host range of chronic wasting disease is altered on passage in ferrets. *Virology* 251: 297–301.
30. Watts JC, Giles K, Patel S, Oehler A, DeArmond SJ, et al. (2014) Evidence that bank vole PrP is a universal acceptor for prions. *PLoS Pathog* 10: e1003990.
31. Kurt TD, Jiang L, Fernández-borges N, Bett C, Liu J, et al. (2015) Human prion protein sequence elements impede cross-species chronic wasting disease transmission. *J Clin Invest* 125: 1485–1496.
32. Richardson JS, Richardson DC (2002) Natural beta-sheet proteins use negative design to avoid edge-to-edge aggregation. *Proc Natl Acad Sci U S A* 99: 2754–2759.
33. Deleault NR, Piro JR, Walsh DJ, Wang F, Ma J, et al. (2012) Isolation of phosphatidylethanolamine as a solitary cofactor for prion formation in the absence of nucleic acids. *Proc Natl Acad Sci U S A* 109: 8546–8551.
34. Ma J (2012) The Role of Cofactors in Prion Propagation and Infectivity. *PLoS Pathog* 8: e1002589. doi:10.1371/journal.ppat.1002589.

35. Imamura M, Kato N, Okada H, Yoshioka M, Iwamaru Y, et al. (2013) Insect Cell-Derived Cofactors Become Fully Functional after Proteinase K and Heat Treatment for High-Fidelity Amplification of Glycosylphosphatidylinositol-Anchored Recombinant Scrapie and BSE Prion Proteins. *PLoS One* 8: e82538.
36. Belli M, Ramazzotti M, Chiti F (2011) Prediction of amyloid aggregation in vivo. *EMBO Rep* 12: 657–663.

## Figure 1

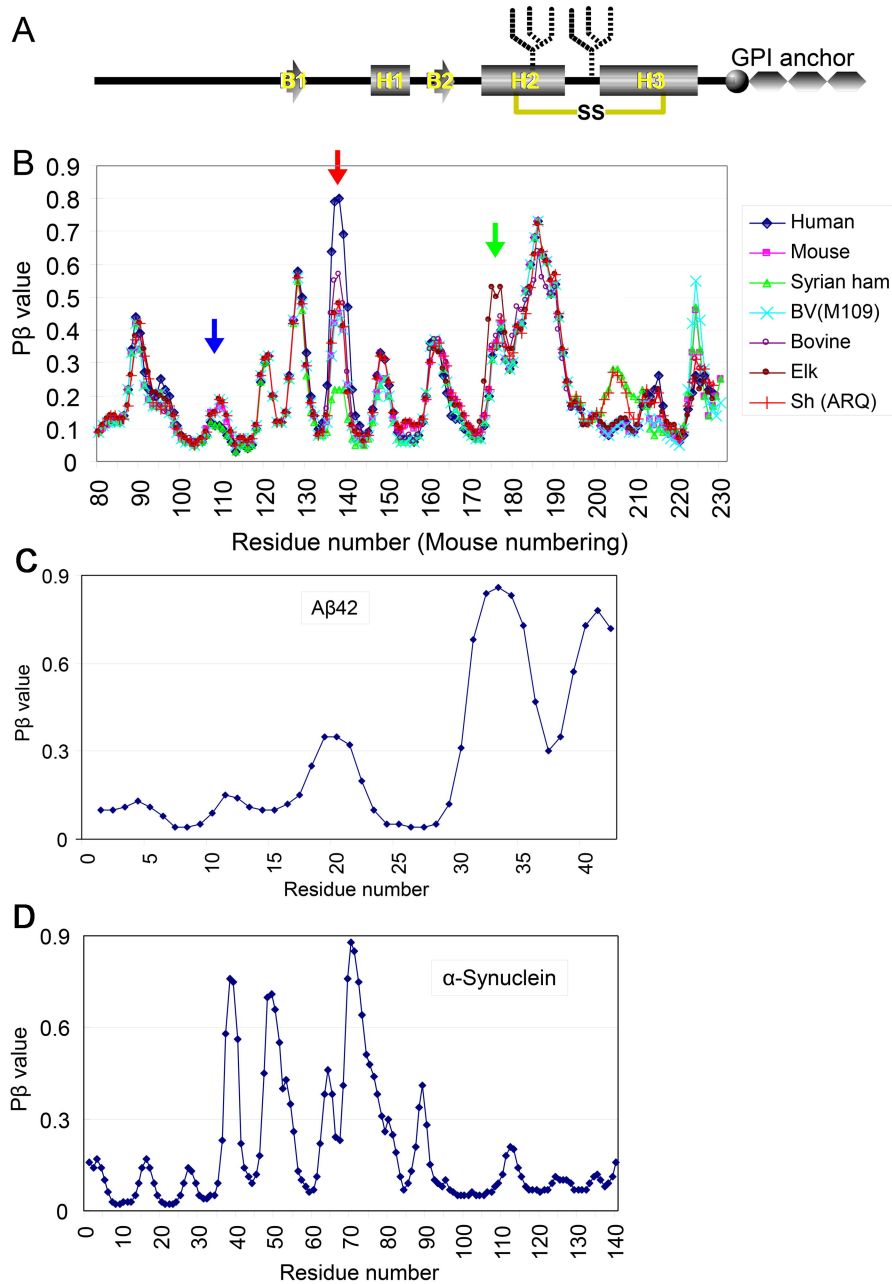

**Figure 1. P $\beta$ -graphs of PrP of representative species look very alike but with certain differences.**

**A.** A schematic illustration of the secondary-structure components of prion protein (PrP) and post-translational modifications, i.e. a disulfide link (yellow line with "SS"), N-linked glycans (fork-like objects) and glycosylphosphatidylinositol anchor (GPI anchor). B1 and B2, the first and the second  $\beta$ -strands, respectively. H1, H2 and H3, the first, second and the third  $\alpha$ -helix, respectively.

**B.** P $\beta$ -graphs of PrP from various species. The blue, red and green arrows indicate peaks centered at the residue 110, 140 and 175, respectively. Syrian ham, Syrian hamster. BV(109M), bank vole with methionine at the residue 109 (in bank-vole numbering). Sh(ARQ), sheep with A136/R150/Q171 polymorphism.

**C and D.** P $\beta$ -graphs of A $\beta$ 42 and human  $\alpha$ -synuclein, respectively.

## Figure 2

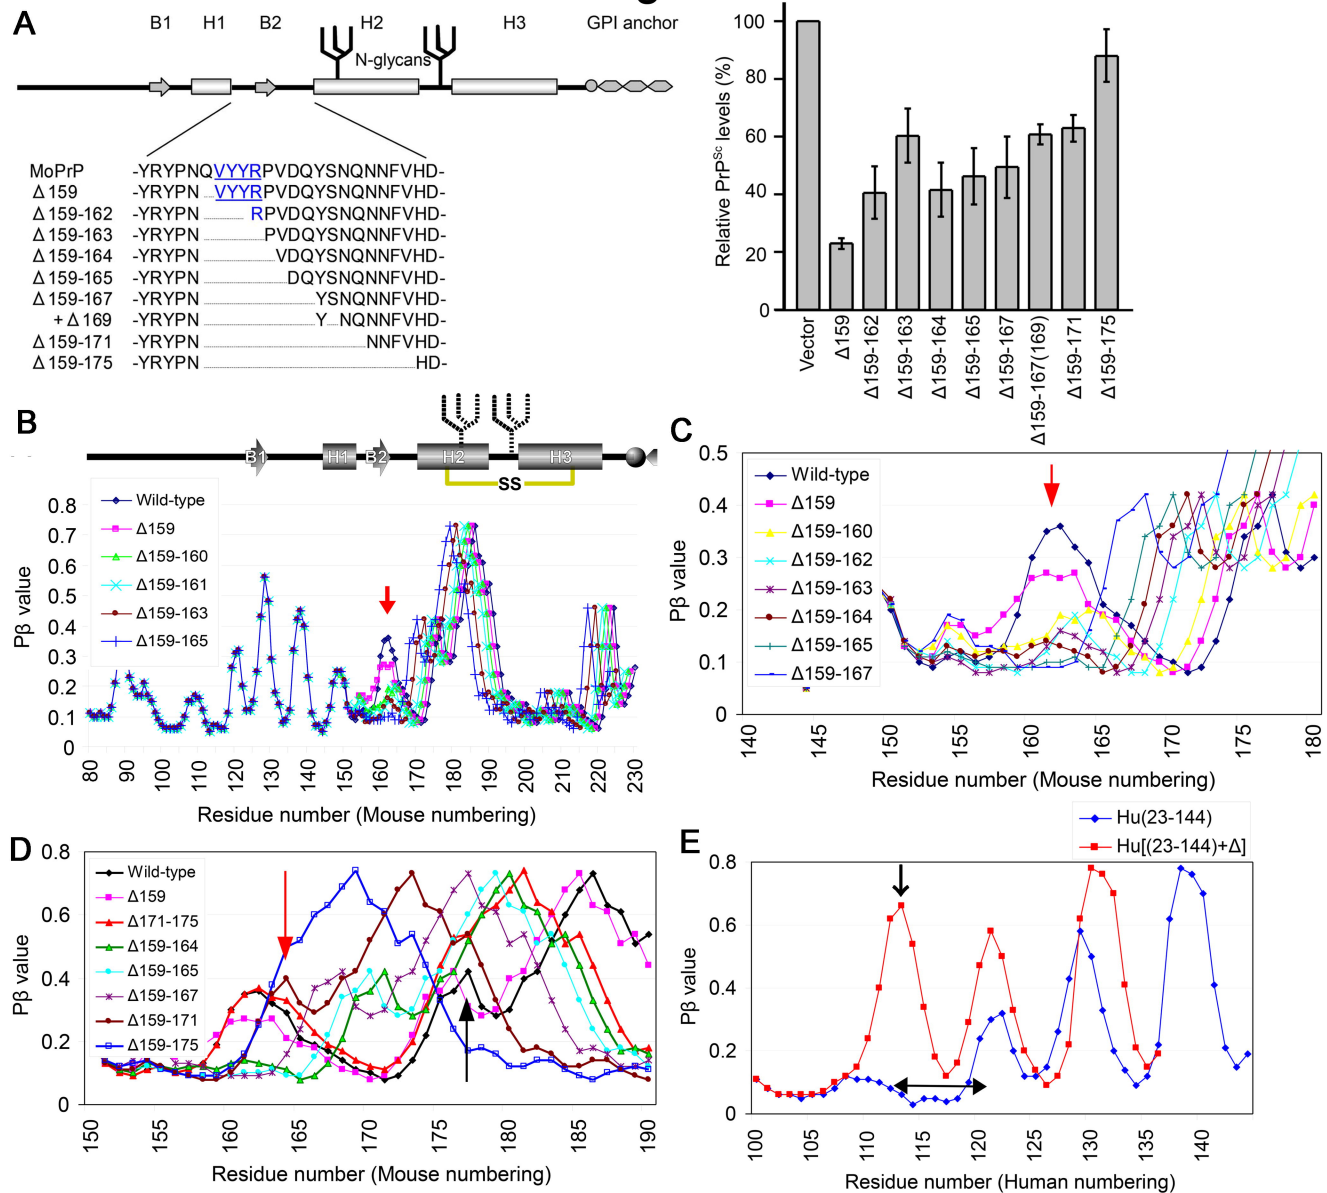

**Figure 2. Biological relevance of P $\beta$ : heights of P $\beta$  peaks correlate with dominant-negative inhibition of  $\Delta$ PrP-series mutants.**

**A. (Left panel)** A schematic illustration of the deletion-mutant PrP with deletions in the region between H1 and H2 ( $\Delta$ PrP-series) and **(right panel)** a graph showing the PrP<sup>Sc</sup> levels of convertible PrP coexisting with the indicated non-convertible  $\Delta$ PrP mutant on 22L-infected N2a cells, cited from [13]. Note that PrP<sup>Sc</sup> levels of the convertible PrP increase, as the deletion size of the co-existing  $\Delta$ PrP enlarged: this means that the dominant-negative inhibitory effects of the non-convertible  $\Delta$ PrP on the co-existing convertible PrP are decreased as the deletion elongates. MoPrP, wild-type mouse PrP.

**B.** P $\beta$ -graphs of wild-type mouse PrP and  $\Delta$ PrP mutants. Note that height of the peak at around the residue 160 is gradually lowered as the deletion is elongated (red arrow), while the appearances of the rest of the P $\beta$ -graphs are hardly affected.

**C.** P $\beta$ -graphs of wild-type mouse PrP and  $\Delta$ PrP mutants, focused on the region from the residue 140 to 180, to show the diminution of the peak clearly.

**D.** P $\beta$ -graphs of wild-type mouse PrP and  $\Delta$ PrP mutants focused on the region from the residue 150 to 190, focusing on another peak at around the residue 175 (black arrow). Note that the peak becomes narrower in the  $\Delta 159-171$  (red arrow) and finally disappear in  $\Delta 159-175$  (blue curve with open square).

**E.** P $\beta$ -graphs of C-terminally-truncated human PrP [Hu(23-144)] and a deletion variant of the truncated mutant [Hu(23-144)+ $\Delta$ ] which has internal deletion from the residue 113 to 120 (left-right arrow) [14]. Note that another large peak appears by the deletion 113-120 (arrow).



## Figure 3

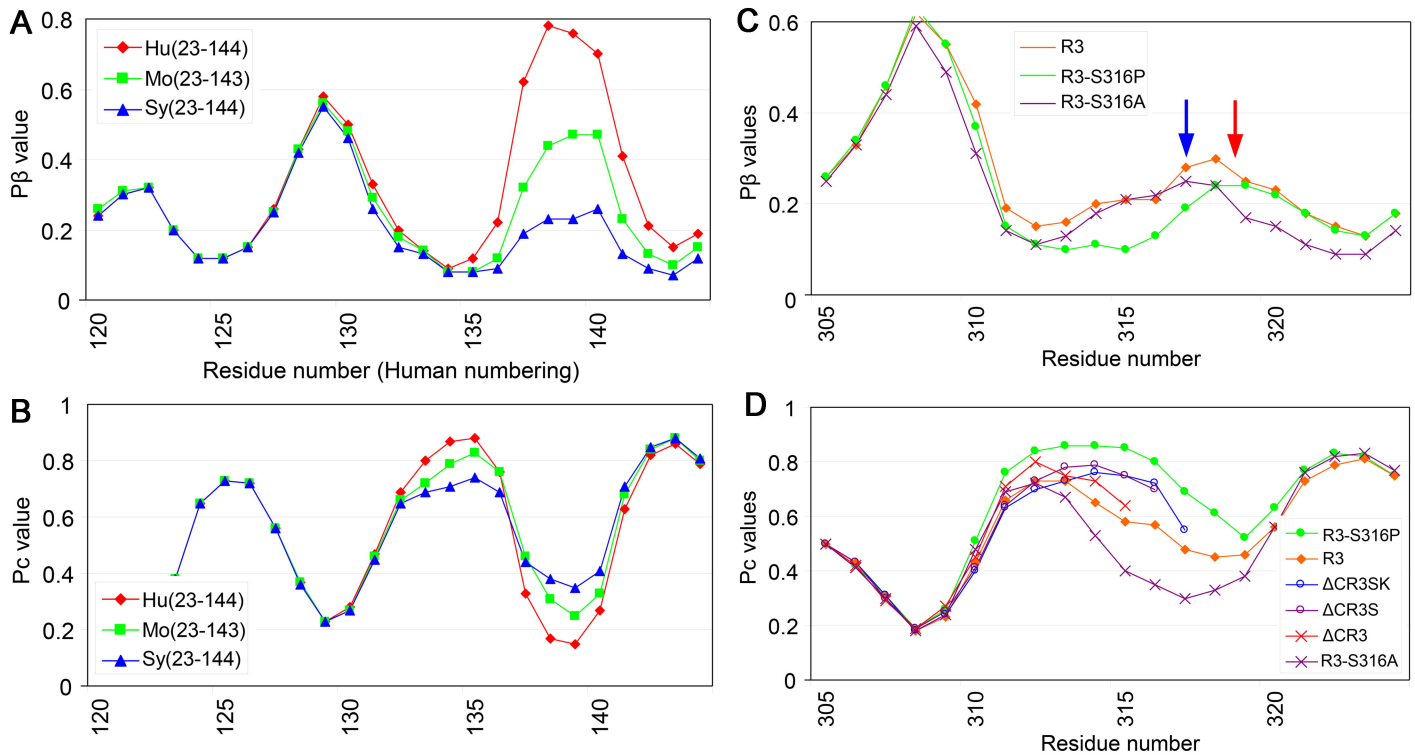

### Figure 3. Smaller discrepancies in Pc values in P $\beta$ -trough regions are advantageous for cross-seeding of amyloids.

**A.** P $\beta$ -graphs of Hu(23-144) and C-terminally-truncated mouse and Syrian hamster PrP, Mo(23-143) and Sy(23-144), respectively, which are equivalent to Hu(23-144) [15]. Note that Hu(23-140) is the highest in the peak at ~140, while Sy(23-144) is the lowest and Mo(23-143) positioned in between. Interestingly, the heights of the peak seem to correlate with their amyloid formation efficiencies: Hu(23-144) most efficient, Sy(23-144) least efficient and Mo(23-143) intermediate.

**B.** Pc-graphs of Hu(23-144), Mo(23-143) and Sy(23-144). Note that the Pc-peak at ~135 is located at a position between two P $\beta$ -peaks, P $\beta$ -trough (compare with **Fig. 3A**) and the Pc-peak is highest in Hu(23-144), lowest in Sy(23-144) and intermediate in Mo(23-143).

**C.** P $\beta$ -graphs of tau-derived amyloidogenic peptide, R3, and its substitution variants, R3-S316A and R3-S316P, whose serine residue at the codon 316 was replaced with alanine or proline, respectively [16]. Note that the two variants have P $\beta$  peaks at different positions (red and blue arrows). The wide P $\beta$  trough of R3-S316P might explain the inefficient fibril formation due to too high freedom of motion in the loop/kink between the two strands.

**D.** Pc-graphs of R3, the two substitution variants, and C-terminally-truncated variants,  $\Delta$ CR3SK,  $\Delta$ CR3S and  $\Delta$ CR3.  $\Delta$ CR3S and  $\Delta$ CR3SK have the serine at the codon 316, whereas  $\Delta$ CR3 lacks it. Note that the curves of  $\Delta$ CR3S and  $\Delta$ CR3SK are similar to R3-S316P but the curve of  $\Delta$ CR3 is closer to the wild-type R3. R3-S316A is rather far from R3-S316P.

## Figure 4

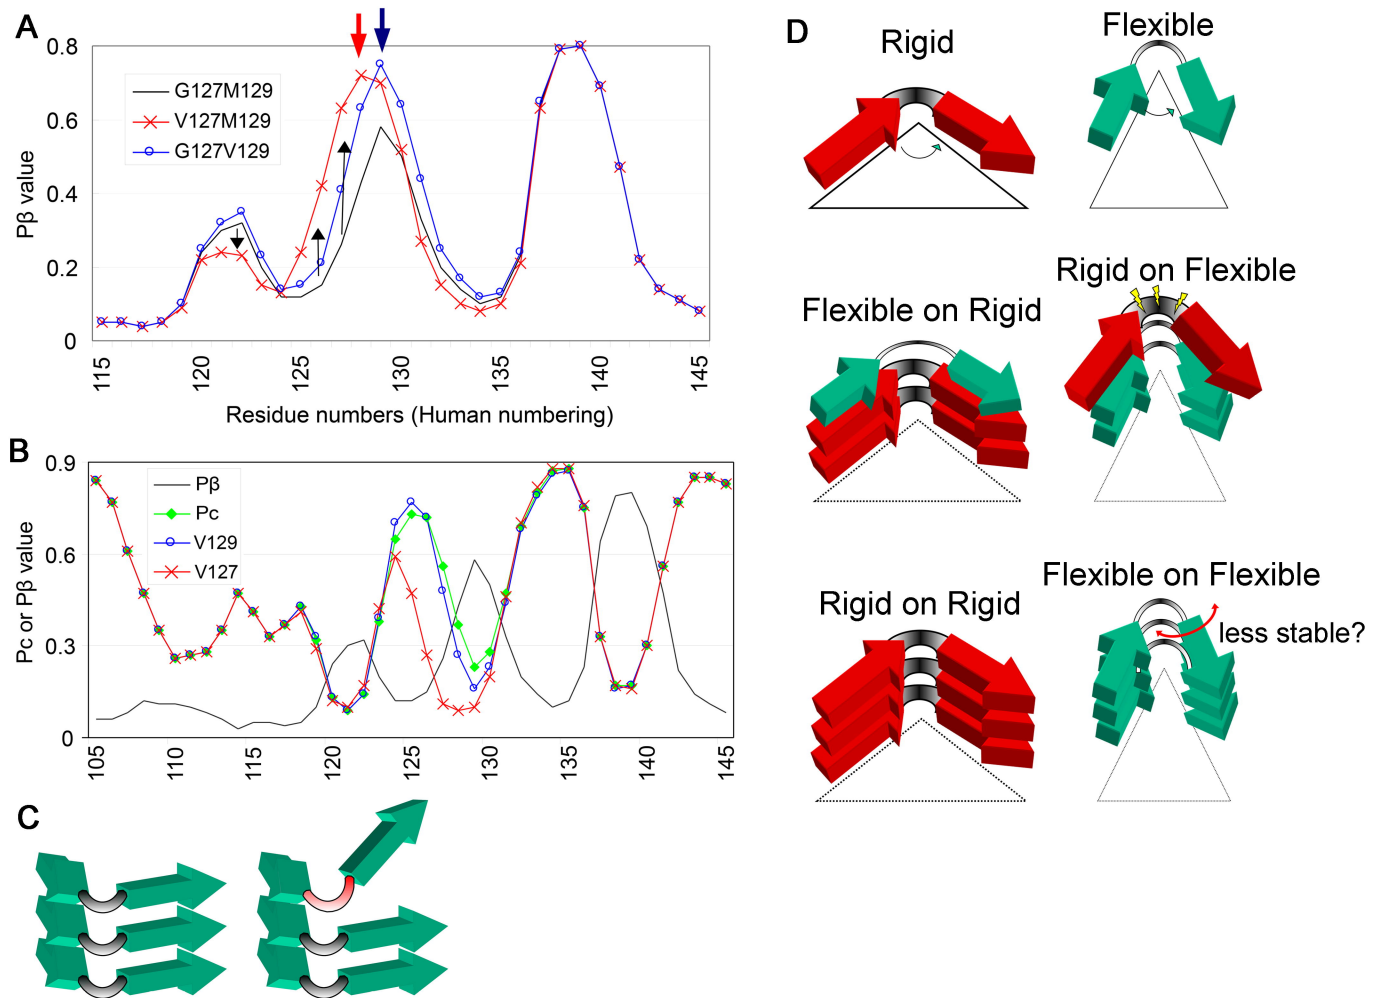

**Figure 4. Positions of the  $\beta$ -strands and flexibility of the loop/kink might affect cross-seeding efficiencies.**

**A.** Anti-prion effects of a polymorphism V127 can be attributable to alterations in  $P\beta$  and  $P_c$ . Comparison of  $P\beta$ -graphs of human PrP with polymorphisms V127 (V127M129), V129 (G127V129) and the wild type PrP (G127M129). The red and blue arrows indicate the crests of peaks of V127M129 and G127V129, respectively. Black arrows indicate changes of  $P\beta$  values of V127M129 from those of the wild-type.

**B.** Comparison of  $P_c$ -graphs of wild-type human PrP and those with the polymorphism V129 or V127. The gray curve represents the  $P\beta$ -graph of the wild-type human PrP.

**C.** A schematic illustration of a possible influence of the loop/kink region on parallel-in-register  $\beta$ -sheet formation. If the properties of loops/kinks, e.g. flexibility or length, are different, the peptides could not form a stable parallel-in-register  $\beta$ -sheet.

**D.** Schematic illustrations of two types of  $\beta$ -loop- $\beta$  motifs ( $\beta$ -arch) with either a rigid (upper panels, red arrows with a thick intervening loop/kink) or a flexible loop (green arrows with a thin intervening loop). The middle panels illustrate heterologous template-substrate conversion reactions: the left panel shows a reaction where the template has the rigid loops/kinks and the substrate has a flexible loop, and the right panel shows the opposite case. The bottom panels illustrate homologous substrate-template conversion reactions.

## Figure 5

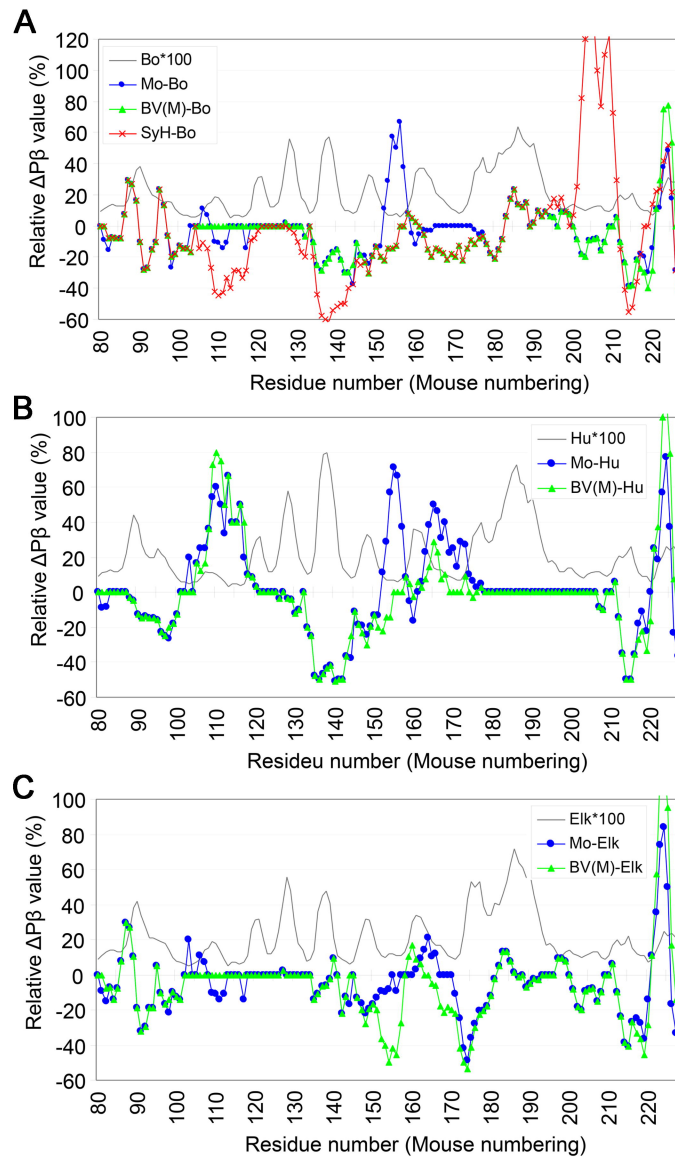

### Figure 5. Relative $\Delta P\beta$ -graphs can reveal subtle differences in $P\beta$ between PrP from different species

**A.** Comparison of  $\Delta P\beta$ -graphs of PrP from mouse (Mo), Syrian hamster (SyH) and bank vole with methionine at the polymorphic codon 109 [BV(M)] relative to bovine PrP (Bo). The gray curve without any marker represents a  $P\beta$ -graph of bovine PrP, multiplied by 100 to enable comparison with the  $\Delta P\beta$ -graphs ( $Bo*100$ ).

**B and C.** Comparisons of  $\Delta P\beta$ -graphs of mouse and bank vole with M109 relative to human PrP (**B**) and elk PrP (**C**). Note that the relative  $\Delta P\beta$ -graph patterns of are substantially changed depending on what species is used for the reference.



## Figure 6

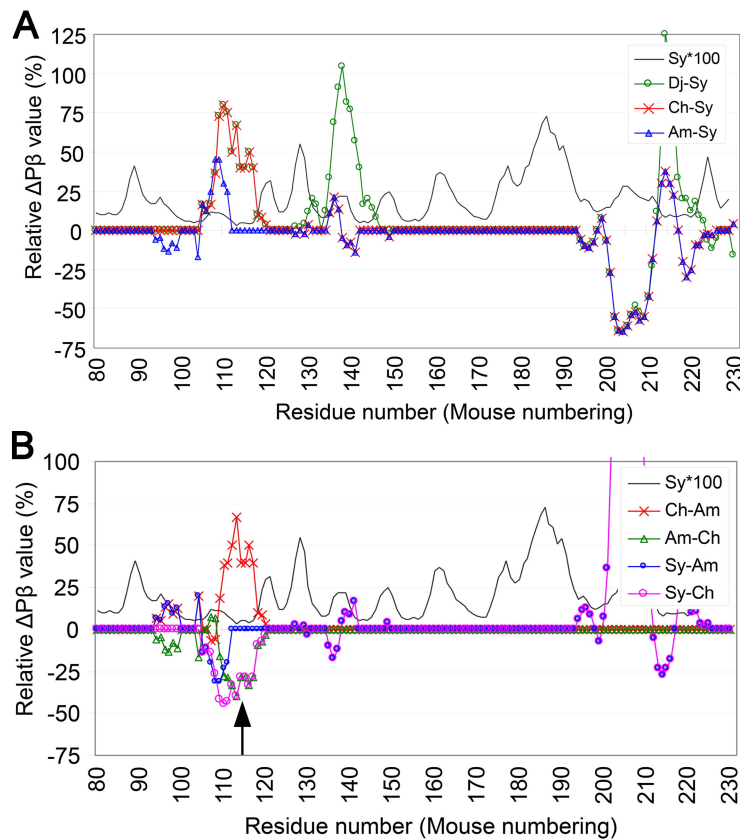

**Figure 6. Relative  $\Delta P\beta$ -graphs of transmissions of Sc237 among various hamster species visually aid interpretation of the results.**

**A.**  $\Delta P\beta$ -graphs of various hamsters relative to Syrian hamster PrP, for transmissions of Sc237 from Syrian hamster to the other hamster species. The reference species are the donors of the transmissions and the former species are the recipients. Sy, Syrian hamster. Ch, Chinese hamster. Am, Armenian hamster. Dj, Djungarian hamster.

**B.**  $\Delta P\beta$ -graphs for back-transmissions of Sc237 from the different hamster species to Syrian hamster, and for the transmission between Armenian and Chinese hamsters. The upward arrow indicates the position of the P $\beta$ -trough at the residue ~115.

## Figure 7

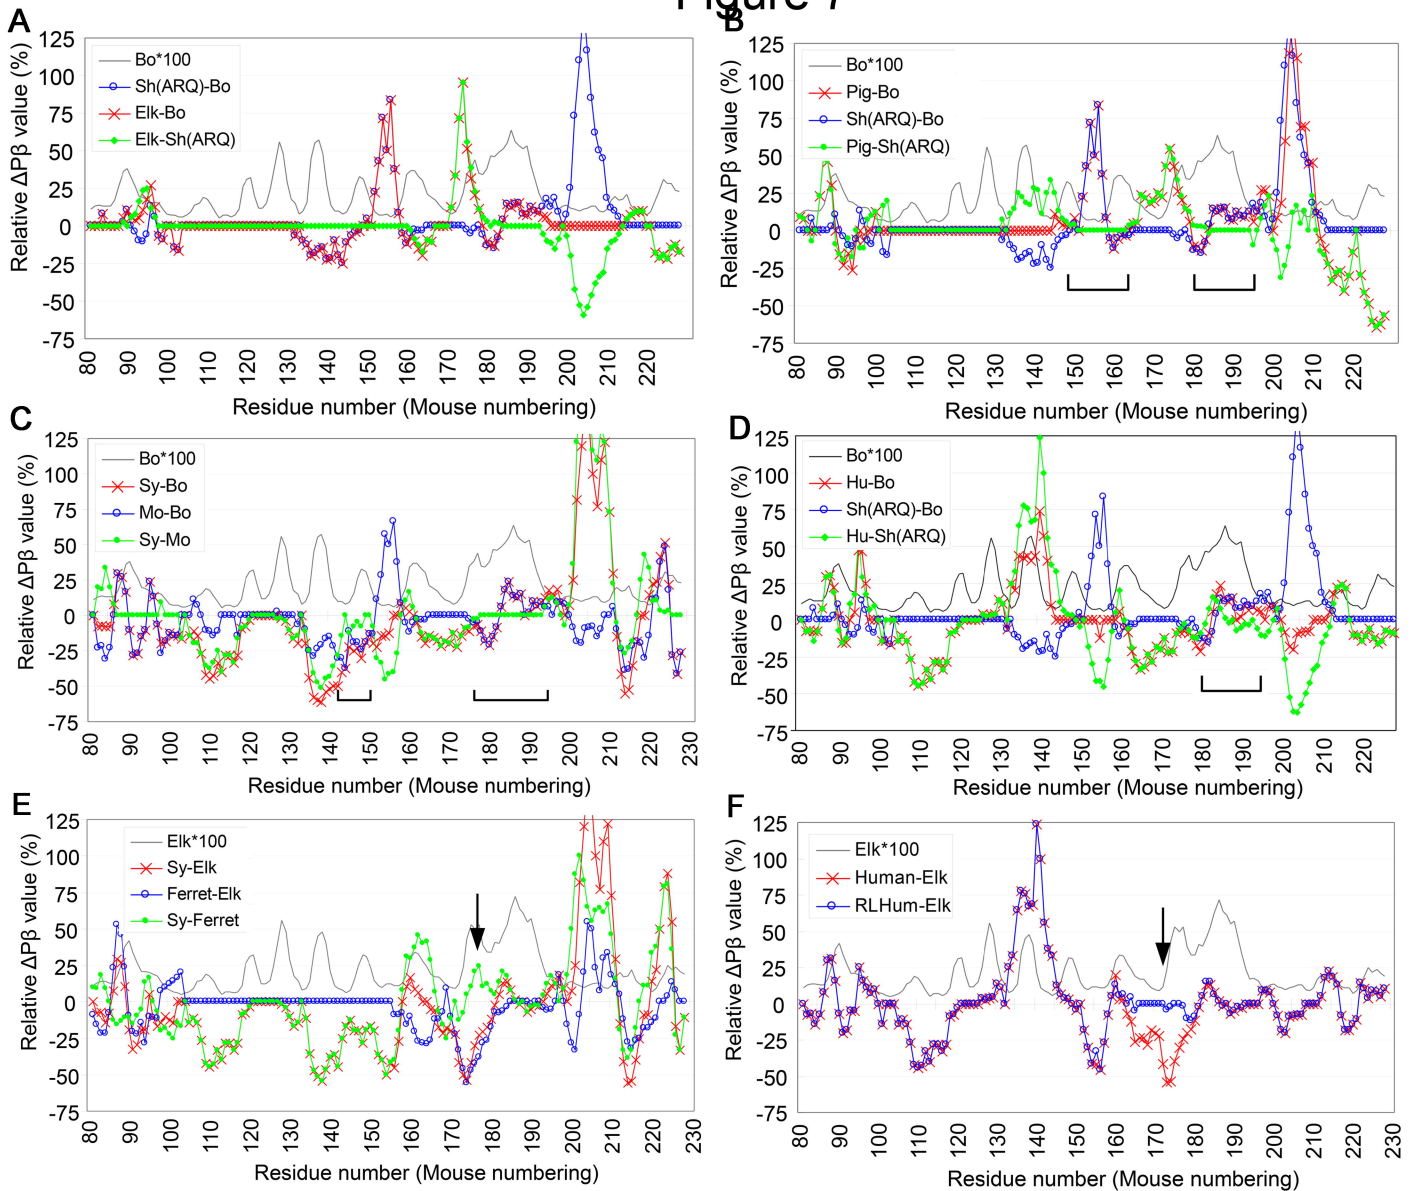

**Figure 7. Relative  $\Delta P\beta$ -graphs of interspecies transmissions visually aid interpretation and are suggestive of how changes of host ranges could occur.**

**A.** Relative  $\Delta P\beta$ -graphs of transmissions of C-BSE from cattle to sheep with ARQ polymorphism [Sh(ARQ)-Bo], from cattle to Tg mice expressing elk PrP (Elk-Bo) and transmission of ovine PrP-adapted C-BSE to Tg mice expressing elk PrP [Elk-Sh(ARQ)] [26]. The latter species are donors and the former species are recipient of the transmissions. The blue, red and green curves represent the efficient, the inefficient and the improved transmissions, respectively.

**B.** Relative  $\Delta P\beta$ -graphs of transmissions of C-BSE from cattle to Tg mice expressing porcine PrP (Pig-Bo) and of ovine PrP-adapted C-BSE to Tg mice expressing porcine PrP [Pig-Sh(ARQ)]. The bottom brackets indicate regions which were flattened by the passage through the sheep [27].

**C.** Relative  $\Delta P\beta$ -graphs of transmissions of C-BSE from cattle to mouse (Mo-Bo), from cattle to Syrian hamster (Sy-Bo) and mouse-adapted C-BSE to Syrian hamster (Sy-Mo) [28].

**D.** Relative  $\Delta P\beta$ -graphs of transmissions of C-BSE from cattle to Tg mice expressing human PrP (Hu-Bo) and of ovine PrP-adapted C-BSE to human [Hu-Sh(ARQ)] [25].

**E.** Relative  $\Delta P\beta$ -graphs of transmissions of CWD from elk to ferret (Ferret-Elk), from elk to Syrian hamster (Sy-Elk) and ferret-adapted CWD to Syrian hamster (Sy-Ferret). Note that the large negative peak at around the residue 175 disappeared after passage through ferret (arrow) [29].

**F.** Relative  $\Delta P\beta$ -graphs of transmissions of CWD from elk to Tg mice expressing human PrP (Human-Elk) and from elk to Tg mice expressing human PrP with elk residues in the region from the residue 166 to 174 (RLHuman-Elk) [31]. The arrow indicates the region where the graph pattern was changed by the substitutions.

## Supplementary Figure S1

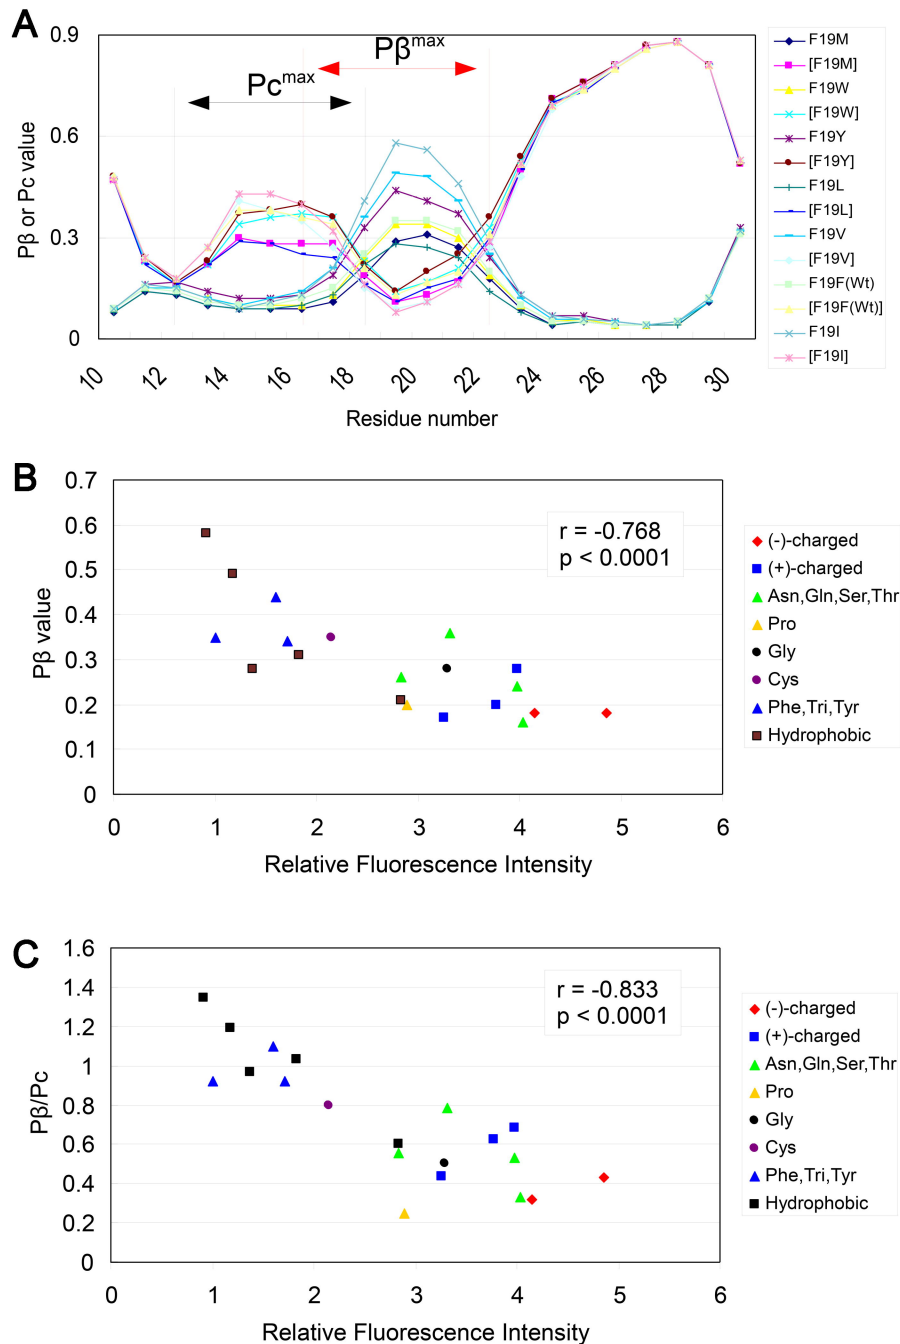

### Supplementary Figure S1. $P\beta$ values have a fair correlation with aggregation efficiencies of substitution-mutant $A\beta_{42}$ and $P\beta^{\max}/Pc^{\max}$ show even better correlation.

**A.** Examples of  $P\beta$ - and  $Pc$ -graphs of some of the mutant  $A\beta_{42}$ .  $P\beta^{\max}$ , the highest  $P\beta$  value in the interval from 17 to 23.  $Pc^{\max}$ , the highest  $Pc$  value in the interval from 13 to 19. The curves labeled with square brackets, e.g. [F19Y], represent the  $Pc$ -graph of the mutant, while those without the square brackets represent  $P\beta$ -graphs.

**B.** A scatter plot illustrating the correlation between  $P\beta^{\max}$  values of the mutant  $A\beta_{42}$  and relative fluorescence intensities of the  $A\beta_{42}$ -GFP fusion proteins.

**C.** A scatter plot illustrating the correlation between the ratio of  $P\beta^{\max}$  and  $Pc^{\max}$ ,  $P\beta^{\max}/Pc^{\max}$ , of the mutant  $A\beta_{42}$  and relative fluorescence intensities of the  $A\beta_{42}$ -GFP fusion proteins. Note that the correlation coefficient was improved compared with the scatter plot in **Fig. S1B**.
